# Supplementary material for: The Effect of Diabetes-Associated Autoantigens on Cell Processes in Human PBMCs and Their Relevance to Autoimmune Diabetes Development
Source: Hindawi journal article supplement (doi:10.1155/2013/589451), 2013-01-01
Supplement: f1 [file 589451.f1.pdf]

**Table 1s**

**Further characterisation of T1D patients and relatives who were autoantibody positive**

| <b>T1D patients</b> |                    |                            |
|---------------------|--------------------|----------------------------|
| <b>Sex</b>          | <b>Age (years)</b> | <b>Autoantibody status</b> |
| <b>F</b>            | <b>3</b>           | <b>IAA</b>                 |
| <b>F</b>            | <b>5</b>           | <b>IAA, IA-2A</b>          |
| <b>F</b>            | <b>5</b>           | <b>IAA, IA-2A</b>          |
| <b>F</b>            | <b>14</b>          | <b>IA-2A, GADA</b>         |
| <b>F</b>            | <b>13</b>          | <b>IA-2A, GADA</b>         |
| <b>F</b>            | <b>15</b>          | <b>GADA</b>                |
| <b>M</b>            | <b>4</b>           | <b>IA-2A</b>               |
| <b>M</b>            | <b>7</b>           | <b>IA-2A</b>               |
| <b>M</b>            | <b>13</b>          | <b>IA-2A, GADA</b>         |
| <b>M</b>            | <b>14</b>          | <b>IA-2A, GADA</b>         |
| <b>M</b>            | <b>14</b>          | <b>IA-2A, GADA</b>         |
| <b>M</b>            | <b>41</b>          | <b>GADA</b>                |
| <b>Relatives</b>    |                    |                            |
| <b>F</b>            | <b>3</b>           | <b>IAA</b>                 |
| <b>F</b>            | <b>21</b>          | <b>IA-2A, GADA</b>         |
| <b>M</b>            | <b>3</b>           | <b>IAA, IA-2A</b>          |
| <b>M</b>            | <b>4</b>           | <b>IA-2A, GADA</b>         |
| <b>M</b>            | <b>5</b>           | <b>IA-2A</b>               |
| <b>M</b>            | <b>5</b>           | <b>IA-2A, GADA</b>         |
| <b>M</b>            | <b>7</b>           | <b>IA-2A, GADA</b>         |
| <b>M</b>            | <b>8</b>           | <b>IA-2A, GADA</b>         |
| <b>M</b>            | <b>10</b>          | <b>IA-2A, GADA</b>         |

**Table 2s**

**Top twenty up- or downregulated genes for each comparison**

| <b>UPREGULATED</b>                                                                      |                     |             |         |
|-----------------------------------------------------------------------------------------|---------------------|-------------|---------|
| First group is always upregulated in comparison do the other one.                       |                     |             |         |
| Entrez_Gene_Description                                                                 | Entrez_Gene_Name    | Fold_change | P_Value |
| <b>DV vs D</b>                                                                          |                     |             |         |
| renin                                                                                   | <i>REN</i>          | 2.177       | 0.002   |
| melanoma antigen, family C, 1                                                           | <i>MAGEC1</i>       | 2.001       | 0.002   |
| glycoprotein hormone beta 5                                                             | <i>GPHB5</i>        | 1.918       | 0.000   |
| relaxin 3 receptor 1                                                                    | <i>RLN3R1</i>       | 1.866       | 0.000   |
| homeo box (H6 family) 3                                                                 | <i>HMX3</i>         | 1.832       | 0.001   |
| tripartite motif-containing 67                                                          | <i>TRIM67</i>       | 1.817       | 0.000   |
| zinc finger protein 560                                                                 | <i>ZNF560</i>       | 1.814       | 0.000   |
| carboxypeptidase E                                                                      | <i>CPE</i>          | 1.813       | 0.001   |
| DKFZP434A062 protein                                                                    | <i>DKFZP434A062</i> | 1.809       | 0.001   |
| late cornified envelope 2B                                                              | <i>LCE2B</i>        | 1.798       | 0.000   |
| cholinergic receptor, nicotinic, gamma polypeptide                                      | <i>CHRNA3</i>       | 1.789       | 0.001   |
| phosphatidylinositol-specific phospholipase C, X domain containing 2                    | <i>PLCXD2</i>       | 1.722       | 0.002   |
| dystrophin related protein 2                                                            | <i>DRP2</i>         | 1.708       | 0.001   |
| polycystic kidney disease 1-like 2                                                      | <i>PKD1L2</i>       | 1.702       | 0.001   |
| ATP-binding cassette, sub-family A (ABC1), member 4                                     | <i>ABCA4</i>        | 1.693       | 0.001   |
| similar to developmental pluripotency associated 5; embryonal stem cell specific gene 1 | <i>LOC340168</i>    | 1.689       | 0.001   |
| similar to precursor peptide                                                            | <i>LOC340204</i>    | 1.685       | 0.001   |
| growth differentiation factor 8                                                         | <i>GDF8</i>         | 1.677       | 0.000   |
| similar to RIKEN cDNA 2410004A20                                                        | <i>LOC154288</i>    | 1.666       | 0.001   |
| similar to Pregnancy specific beta-1-glycoprotein 4, isoform 1                          | <i>LOC440534</i>    | 1.635       | 0.001   |
| <b>DRLvs DV</b>                                                                         |                     |             |         |
| ATPase, (Na <sup>+</sup> )/K <sup>+</sup> transporting, beta 4 polypeptide              | <i>ATP1B4</i>       | 1.935       | 0.001   |

|                                                                         |                  |       |       |
|-------------------------------------------------------------------------|------------------|-------|-------|
| scavenger receptor cysteine rich domain containing, group B (4 domains) | <i>SRCRB4D</i>   | 1.893 | 0.000 |
| dynein, axonemal, heavy polypeptide 8                                   | <i>DNAH8</i>     | 1.732 | 0.001 |
| programmed cell death 2                                                 | <i>PDCD2</i>     | 1.681 | 0.003 |
| aldo-keto reductase family 1, member C-like 1                           | <i>AKR1CL1</i>   | 1.664 | 0.001 |
| integrin, alpha 10                                                      | <i>ITGA10</i>    | 1.638 | 0.000 |
| chromosome 10 open reading frame 92                                     | <i>C10orf92</i>  | 1.622 | 0.002 |
| chromosome 8 open reading frame 15                                      | <i>C8orf15</i>   | 1.583 | 0.004 |
| C1q and tumor necrosis factor related protein 3                         | <i>C1QTNF3</i>   | 1.549 | 0.003 |
| F-box and leucine-rich repeat protein 14                                | <i>FBXL14</i>    | 1.519 | 0.002 |
| CD5 antigen-like (scavenger receptor cysteine rich family)              | <i>CD5L</i>      | 1.502 | 0.002 |
| tripartite motif-containing 55                                          | <i>TRIM55</i>    | 1.473 | 0.004 |
| H2A histone family, member J                                            | <i>H2AFJ</i>     | 1.459 | 0.002 |
| parathyroid hormone                                                     | <i>PTH</i>       | 1.456 | 0.003 |
| chromosome 21 open reading frame 13                                     | <i>C21orf13</i>  | 1.426 | 0.005 |
| similar to sphingomyelin phosphodiesterase 3, neutral membrane          | <i>LOC392275</i> | 1.423 | 0.003 |
| serologically defined colon cancer antigen 33                           | <i>SDCCAG33</i>  | 1.387 | 0.002 |
| minor histocompatibility antigen HA-1                                   | <i>HA-1</i>      | 1.380 | 0.001 |
| dual specificity phosphatase 8                                          | <i>DUSP8</i>     | 1.365 | 0.001 |
| proprotein convertase subtilisin/kexin type 5                           | <i>PCSK5</i>     | 1.361 | 0.003 |
| <b>DRLvs D</b>                                                          |                  |       |       |
| kelch domain containing 4                                               | <i>KLHDC4</i>    | 1.586 | 0.000 |
| growth differentiation factor 8                                         | <i>GDF8</i>      | 1.673 | 0.000 |
| similar to precursor peptide                                            | <i>LOC340204</i> | 1.815 | 0.000 |
| glial fibrillary acidic protein                                         | <i>GFAP</i>      | 1.911 | 0.000 |
| cholinergic receptor, nicotinic, gamma polypeptide                      | <i>CHRNA7</i>    | 1.921 | 0.000 |
| hepatocyte nuclear factor 4, alpha                                      | <i>HNF4A</i>     | 1.499 | 0.000 |
| colipase, pancreatic                                                    | <i>CLPS</i>      | 1.799 | 0.000 |
| chromosome 11 open reading frame 33                                     | <i>C11orf33</i>  | 1.565 | 0.000 |
| crystallin, gamma D                                                     | <i>CRYGD</i>     | 1.635 | 0.000 |
| MEGF11 protein                                                          | <i>MEGF11</i>    | 1.519 | 0.000 |
| FLJ16237 protein                                                        | <i>FLJ16237</i>  | 1.656 | 0.000 |

|                                                                                              |                 |       |       |
|----------------------------------------------------------------------------------------------|-----------------|-------|-------|
| serine (or cysteine) proteinase inhibitor, clade B (ovalbumin), member 2                     | <i>SERPINB2</i> | 2.368 | 0.000 |
| a disintegrin-like and metalloprotease (repolysin type) with thrombospondin type 1 motif, 19 | <i>ADAMTS19</i> | 1.690 | 0.001 |
| gap junction protein, alpha 10, 59kDa                                                        | <i>GJA10</i>    | 1.682 | 0.001 |
| folate receptor 2 (fetal)                                                                    | <i>FOLR2</i>    | 2.623 | 0.001 |
| relaxin 3 receptor 1                                                                         | <i>RLN3R1</i>   | 1.708 | 0.001 |
| transient receptor potential cation channel, subfamily C, member 6                           | <i>TRPC6</i>    | 1.484 | 0.001 |
| GCIP-interacting protein p29                                                                 | <i>P29</i>      | 1.572 | 0.001 |
| NADH:ubiquinone oxidoreductase MLRQ subunit homolog                                          | <i>LOC56901</i> | 1.384 | 0.001 |
| chemokine (C-X-C motif) ligand 1 (melanoma growth stimulating activity, alpha)               | <i>CXCL1</i>    | 1.816 | 0.001 |

| <b>DOWNREGULATED</b>                                                           |                         |                    |                |
|--------------------------------------------------------------------------------|-------------------------|--------------------|----------------|
| <b>First group is always downregulated in comparison do the other one.</b>     |                         |                    |                |
| <b>Entrez_Gene_Description</b>                                                 | <b>Entrez_Gene_Name</b> | <b>Fold_change</b> | <b>P_Value</b> |
| <b>DV vs D</b>                                                                 |                         |                    |                |
| solute carrier family 7 (cationic amino acid transporter, y+ system), member 3 | <i>SLC7A3</i>           | 0.464              | 0.002          |
| transient receptor potential cation channel, subfamily V, member 3             | <i>TRPV3</i>            | 0.472              | 0.005          |
| ring finger protein 144                                                        | <i>RNF144</i>           | 0.484              | 0.001          |
| collagen, type XVI, alpha 1                                                    | <i>COL16A1</i>          | 0.543              | 0.004          |
| CD4 antigen (p55)                                                              | <i>CD4</i>              | 0.557              | 0.002          |
| LOC441491                                                                      | <i>LOC441491</i>        | 0.562              | 0.006          |
| glomulin, FKBP associated protein                                              | <i>GLMN</i>             | 0.586              | 0.006          |
| tumor susceptibility gene 101                                                  | <i>TSG101</i>           | 0.590              | 0.005          |
| chromosome 6 open reading frame 122                                            | <i>C6orf122</i>         | 0.596              | 0.006          |
| kinesin family member 27                                                       | <i>KIF27</i>            | 0.599              | 0.002          |
| ankyrin repeat and KH domain containing 1                                      | <i>ANKHD1</i>           | 0.600              | 0.003          |
| keratin associated protein 4-5                                                 | <i>KRTAP4-5</i>         | 0.607              | 0.003          |
| myotubularin related protein 7                                                 | <i>MTMR7</i>            | 0.648              | 0.003          |
| zinc finger protein 266                                                        | <i>ZNF266</i>           | 0.653              | 0.005          |
| FLJ42258 protein                                                               | <i>FLJ42258</i>         | 0.654              | 0.001          |

|                                                                                             |                  |       |       |
|---------------------------------------------------------------------------------------------|------------------|-------|-------|
| sarcoma antigen 1                                                                           | <i>SAGE1</i>     | 0.658 | 0.002 |
| chromosome 20 open reading frame 23                                                         | <i>C20orf23</i>  | 0.665 | 0.006 |
| cytochrome P450, family 2, subfamily R, polypeptide 1                                       | <i>CYP2R1</i>    | 0.666 | 0.004 |
| testis specific, 10 interacting protein                                                     | <i>TSGA10IP</i>  | 0.679 | 0.006 |
| solute carrier family 24 (sodium/potassium/calcium exchanger), member 1                     | <i>SLC24A1</i>   | 0.680 | 0.006 |
| <b>DRLvs DV</b>                                                                             |                  |       |       |
| heparan sulfate (glucosamine) 3-O-sulfotransferase 2                                        | <i>HS3ST2</i>    | 0.320 | 0.001 |
| renin                                                                                       | <i>REN</i>       | 0.516 | 0.003 |
| melanoma antigen, family C, 1                                                               | <i>MAGEC1</i>    | 0.522 | 0.002 |
| KIAA1411                                                                                    | <i>KIAA1411</i>  | 0.528 | 0.004 |
| deafness, autosomal dominant 5                                                              | <i>DFNA5</i>     | 0.530 | 0.001 |
| RAB17, member RAS oncogene family                                                           | <i>RAB17</i>     | 0.532 | 0.000 |
| tryptophan hydroxylase 2                                                                    | <i>TPH2</i>      | 0.546 | 0.001 |
| KIAA1889 protein                                                                            | <i>KIAA1889</i>  | 0.569 | 0.002 |
| chromosome 12 open reading frame 4                                                          | <i>C12orf4</i>   | 0.581 | 0.001 |
| D21S2091E                                                                                   | <i>D21S2091E</i> | 0.592 | 0.000 |
| glutathione peroxidase 2 (gastrointestinal)                                                 | <i>GPX2</i>      | 0.619 | 0.004 |
| tripartite motif-containing 67                                                              | <i>TRIM67</i>    | 0.628 | 0.001 |
| myomesin (M-protein) 2, 165kDa                                                              | <i>MYOM2</i>     | 0.631 | 0.001 |
| Jak and microtubule interacting protein 2                                                   | <i>KIAA0555</i>  | 0.633 | 0.001 |
| zinc finger protein 560                                                                     | <i>ZNF560</i>    | 0.635 | 0.000 |
| amiloride-sensitive cation channel 1, neuronal (degenerin)                                  | <i>ACCN1</i>     | 0.637 | 0.003 |
| a disintegrin-like and metalloprotease (repolysin type) with thrombospondin type 1 motif, 1 | <i>ADAMTS1</i>   | 0.646 | 0.003 |
| olfactory receptor, family 11, subfamily A, member 1                                        | <i>OR11A1</i>    | 0.652 | 0.002 |
| KCNQ1 downstream neighbor                                                                   | <i>KCNQ1DN</i>   | 0.656 | 0.002 |
| regulator of G-protein signalling 13                                                        | <i>RGS13</i>     | 0.658 | 0.003 |
| <b>DRLvs D</b>                                                                              |                  |       |       |
| heparan sulfate (glucosamine) 3-O-sulfotransferase 2                                        | <i>HS3ST2</i>    | 0.280 | 0.000 |
| solute carrier family 7 (cationic amino acid transporter, y+ system), member 3              | <i>SLC7A3</i>    | 0.432 | 0.000 |
| HtrA serine peptidase 4                                                                     | <i>HTRA4</i>     | 0.436 | 0.000 |
| GM2 ganglioside activator                                                                   | <i>GM2A</i>      | 0.447 | 0.000 |
| leukocyte immunoglobulin-like receptor, subfamily A (with TM domain), member 2              | <i>LILRA2</i>    | 0.501 | 0.001 |
| apolipoprotein C-I                                                                          | <i>APOC1</i>     | 0.503 | 0.002 |
| deafness, autosomal dominant 5                                                              | <i>DFNA5</i>     | 0.509 | 0.000 |

|                                                                                        |                 |       |       |
|----------------------------------------------------------------------------------------|-----------------|-------|-------|
| phosphatidic acid phosphatase type 2B                                                  | <i>PPAP2B</i>   | 0.525 | 0.001 |
| bone morphogenetic protein 6                                                           | <i>BMP6</i>     | 0.530 | 0.002 |
| GM2 ganglioside activator                                                              | <i>GM2A</i>     | 0.536 | 0.000 |
| RAB17, member RAS oncogene family                                                      | <i>RAB17</i>    | 0.550 | 0.000 |
| pleckstrin and Sec7 domain containing 3                                                | <i>PSD3</i>     | 0.560 | 0.002 |
| coronin, actin binding protein, 1C                                                     | <i>CORO1C</i>   | 0.579 | 0.000 |
| vesicle amine transport protein 1 homolog (T californica)                              | <i>VAT1</i>     | 0.579 | 0.000 |
| homeo box D4                                                                           | <i>HOXD4</i>    | 0.612 | 0.001 |
| sema domain, immunoglobulin domain (Ig), short basic domain, secreted, (semaphorin) 3C | <i>SEMA3C</i>   | 0.613 | 0.001 |
| keratin associated protein 4-5                                                         | <i>KRTAP4-5</i> | 0.614 | 0.002 |
| sialyltransferase 10 (alpha-2,3-sialyltransferase VI)                                  | <i>SIAT10</i>   | 0.626 | 0.000 |
| ferredoxin 1                                                                           | <i>FDX1</i>     | 0.634 | 0.000 |
| cytochrome P450, family 2, subfamily R, polypeptide 1                                  | <i>CYP2R1</i>   | 0.641 | 0.001 |
